# Supplementary material
Source: publisher figshare collection journal article supplement (https://tandf.figshare.com/ndownloader/files/18046679)
Supplement: Supplementary file 1 [file 18046679]

## Sheet: Sheet1
Sclerophrys species	Maximum SVL (mm) (Primary source)	Maximum SVL (mm) (Additional Sources)	Dorsal spots	Skin type	Habitat
arabica	78 (Balletto et al. 1985)		N	rugose	Any peninsular habitat with water (Balletto et al. 1985)
asmarae	88 for males; 93 for females (Largen and Spawls 2010)	88 for males; 93 for females (Channing and Rödel 2019)	N	rugose	Montane grasslands (Largen and Spawls 2010)
blanfordii	47 for males; 49 for females (Largen and Spawls 2010)	47 for males; 49 for females (Channing and Rödel 2019)	N	rugose	Oases – areas of permanent water in arid environments (Largen and Spawls 2010)
brauni	65 for males; 110 for females (Channing and Howell 2006)	65 for males; 110 for females (Channing and Rödel 2019)	Y	rugose	Forests
buchneri	48 (Peters 1882)	36 (holotype) (as Bufo decorsei) (Mocquard 1903); 48 for females (Channing and Rödel 2019)	N	rugose	Forest-Savanna mosiacs (Burgess et al. 2004)
camerunensis	56 for males; 91 for females (Fretey et al. 2011)	70 for females (Channing and Howell 2006); 56 for males; 77 for females (Perret and Amiet 1971); 56 for males; 77 for females (Channing and Rödel 2019)	N	rugose	Rain forests and outlying forest islands (Channing and Howell 2006)
capensis	115 (as Amietophrynus rangeri)(du Preez and Carruthers 2009)	65 for males; 115 for females (Channing and Rödel 2019)	N	rugose	Sub-coastal rivers and streams in grasslands and fynbos (Minter et al. 2004, du Preez and Carruthers 2009)
channingi	112 for males; 143 for females (Barej et al. 2011)	112 for males; 143 for females (Channing and Rödel 2019)	Y	smooth	Forests (Barej et al. 2011)
chudeaui	nomen dubium: Inadequate measurements because only juveniles were measured (Tandy and Keith 1972); also might represent either Bufo xeros, B. regularis, or B. pentoni (Tandy and Feener 1985)	r	N	rugose
danielae	45 for males; 47 for females (Channing and Rödel 2019)	35-45 (Perret 1977)	N	rugose	Rainforests (Perret 1977)
djohongensis	48 for males; 47 for females (very small sample sizes for these estimates) (Hulselmans 1977)		N	rugose	Forest-Savanna mosiacs (Burgess et al. 2004)
dodsoni	53 for males; 64 for females (Largen and Spawls 2010)	59 for females (Baha El Din 2006); 53 for males; 64 for females (Channing and Rödel 2019)	N	rugose	Desert and semi-desert habitats (Largen and Spawls 2010)
fuliginata	59 for males; 66 for females (Channing and Howell 2006)	40 for males; 65 for females (Channing and Rödel 2019)	N	rugose	Forests (Channing and Howell 2006)
funerea	51 for males; 60 for females (Channing 2001)	57 for males; 66 for females (Channing and Howell 2006); 57 for males; 66 for females (Channing and Rödel 2019)	N	rugose	Rain forests and open forests (Channing 2001, Channing and Howell 2006)
garmani	106 for males; 115 for females (Channing 2001)	106 for males; 115 for females (Largen and Spawls 2010); 115 (du Preez and Carruthers 2009); 106 for males; 115 for females (Channing and Rödel 2019)	N	rugose	Savannas (Channing 2001)
gracilipes	30 for males; 41 for females (Fretey et al. 2011)	30 for males; 41 for females (Perret and Amiet 1971); 37 for males, 41 for females (Channing and Rödel 2019)	N	rugose	Forests (Perret and Amiet 1971)
gutturalis	90 for males; 120 for females (Channing and Howell 2006)	120 for females (Channing 2001); 120 (du Preez and Carruthers 2009); 90 for males; 120 for females (Channing and Rödel 2019)	N	rugose	Savannas, thornbush, and urban areas (Channing 2001, Channing and Howell 2006)
kassasii	34 for males; 38.5 for females (Baha El Din 2006)	34 for males; 39 for females (Channing and Rödel 2019)	N	rugose	Highly aquatic, prefers densely vegetated microhabitats in shallow or deep water (Baha El Din 2006)
kerinyagae	85 for males; 88 for females (Largen and Spawls 2010)	85 for males; 86 for females (Channing and Howell 2006); 85 for males; 86 for females (Channing and Rödel 2019)	N	rugose	Flat, open grasslands on high plateaus (Channing and Howell 2006, Largen and Spawls 2010)
kisoloensis	69 for males; 87 for females (Channing 2001)	71 for males; 87 for females (Channing and Howell 2006); 71 for males; 87 for females (Channing and Rödel 2019)	N	Male has smooth back with flattened warts; female has granular warty back	Rivers and cool, moist, montane forests (Channing 2001, Channing and Howell 2006)
langanoensis	60 for males; 63 for females (Largen and Spawls 2010)	60 for males; 63 for females (Channing and Rödel 2019)	N	rugose	Permanent water in dry savanna and semi-desert environments (Largen and Spawls 2010)
latifrons	45 for males; 73 for females (Fretey et al. 2011)	45 for males; 73 for females (Perret and Amiet 1971); 56 for males; 73 for females (Channing and Rödel 2019)	N	rugose	Forests (Perret and Amiet 1971)
lemairii	65 for males; 70 for females (Channing 2001)	70 (du Preez and Carruthers 2009); 65 for males; 70 for females (Channing and Rödel 2019)	N	rugose	Always found near permanent water (Channing 2001), primarily found on floodplains (du Preez and Carruthers 2009)
maculata	60 for males; 85 for females (Rödel 2000)	80 for females (Channing 2001); 64 for males; 72 for females (Largen and Spawls 2010); 64 for males; 80 for females (Channing and Howell 2006); 60 for males; 70 for females (Channing and Rödel 2019)	N	rugose	River banks, savannas, and forests (Channing 2001, Largen and Spawls 2010)
mauritanica	150 (Schleich et al. 1996)	105 for males; 150 for females (Channing and Rödel 2019)	N	rugose	All Mediterranean habitats and oases, but avoids dense forests (Schleich et al. 1996)
pantherina	122 for females (Channing 2001)	140 (du Preez and Carruthers 2009); 115 for males; 147 for females (2019)	N	rugose	Ephemeral ponds (Channing 2001); anywhere with deep water in fynbos and thickets (du Preez and Carruthers 2009)
pardalis	147 for females (Channing 2001)	147 (du Preez and Carruthers 2009); 110 for males; 147 for females (Channing and Rödel 2019)	N	rugose	Open scrub (Channing 2001); Thornveld and open savanna (du Preez and Carruthers 2009)
pentoni	74 for males; 95 for females (Rödel 2000)	60 (Largen and Spawls 2010); 74 for males; 95 for females (Channing and Rödel 2019)	N	rugose	From dry savannas and semi-desert landscapes to coasts (Largen and Spawls 2010)
perreti	43 for males; 59 for females (Schiotz 1963)	43 for males; 65 for females (Channing and Rödel 2019)	N	rugose	Forest-Savanna mosiacs (Burgess et al. 2004)
poweri	100 for females (Channing 2001)	100 (du Preez and Carruthers 2009); 90 for males; 100 for females (Channing and Rödel 2019)	N	rugose	Thornbush and open savanna (Channing 2001
pusilla	65 for males; 80 for females (Channing and Rödel 2019)	63.5 (Wager 1965)	N	rugose	Open and bush country (Wager 1965)
reesi	57 for males; 63 for females (Channing and Howell 2006)	57 for males; 63 for females (Channing and Rödel 2019)	N	rugose	Floodplains (Channing and Howell 2006)
regularis	91 for males; 130 for females (Rödel 2000)	90 for males; 130 for females (Largen and Spawls 2010); 90 for males; 120 for females (Channing and Howell 2006); 91 for males; 130 for females (Channing and Rödel 2019)	N	rugose	Savannas, farmbush, grasslands, and forests (Channing and Howell 2006, Largen and Spawls 2010)
steindachneri	52 for males; 54 for females (Largen and Spawls 2010)	52 for males; 54 for females (Channing and Howell 2006); 52 for males; 54 for females (Channing and Rödel 2019)	N	rugose	Grasslands, wooded savannas, and coastal marshes (Channing and Howell 2006, Largen and Spawls 2010)
superciliaris	128 for males; 153 for females (Barej et al. 2011)	127 for males; 163 for females (Fretey et al. 2011); 128 for males; 163 for females (Channing and Rödel 2019)	Y	smooth	Rain forests (Barej et al. 2011)
taiensis	37.7 for females (as Bufo amieti - N = 2 females) (Tandy and Perret 2000)	32 (holotype) (Rödel and Ernst 2000); 33 for males; 38 for females (Channing and Rödel 2019)	N	rugose	Rain forests (Tandy and Perret 2000)
tihamica	67 (Balletto et al. 1985)		N	rugose	Coastal (Balletto et al. 1985)
togoensis	58 for males; 77 for females (Joger 1981)	56 for males; 85 for females (Rödel and Branch 2002); 60 for males (as Sclerophrys cristiglans) (Inger and Menzies 1961); 64 for males; 83 for females (Channing and Rödel 2019)	N	rugose	Forests and rainforests (Gongomin et al. 2019)
tuberosa	47 for males; 74 for females (Fretey et al. 2011)	47 for males; 74 for females (Perret and Amiet 1971); 48 for males; 74 for females (Channing and Rödel 2019)	N	rugose	Forests (Perret and Amiet 1971)
turkanae	43 for males; 48 for females (Channing and Howell 2006)	43 for males; 48 for females (Channing and Rödel 2019)	N	rugose	Areas with permanent water in desert and arid savannas (Channing and Howell 2006)
urunguensis	29 for females (Channing 2001)	29 for females (Channing and Howell 2006); 29 for males; 33 for females (Channing and Rödel 2019)	N	rugose	Forests and rainforests (Channing 2001, Channing and Howell 2006)
villiersi	60 for males; 74 for females (Perret 1971)	65 for males; 70 for females (Channing and Rödel 2019)	N	rugose	Montane grasslands (IUCN 2019)
vittata	37 for females (Channing and Howell 2006)	32 for males; 37 for females (Channing and Rödel 2019)	N	rugose	Grasslands (Channing and Howell 2006)
xeros	86 for males; 87 for females (Rödel 2000)	86 for males; 97 for females (Largen and Spawls 2010); 82 for males; 97 for females (Channing and Howell 2006); 82 for males; 97 for females (Channing and Rödel 2019)	N	rugose	oases, savannas, deserts, and semi-deserts (Channing and Howell 2006, Largen and Spawls 2010)
